# Supplementary material
Source: PubMed Central journal article supplement (PMC2892964)
Supplement: NIHMS210274-supplement-1.pdf [file NIHMS210274-supplement-1.pdf]

## Supporting Information

### Structure and function of PA4872 from *Pseudomonas aeruginosa*, a novel oxaloacetate decarboxylase from the PEP mutase / isocitrate lyase superfamily<sup>†‡</sup>

Buveneswari Narayanan<sup>1#</sup>, Weiling Nu<sup>2#</sup>, Ying Han<sup>2</sup>, Jiwen Zou<sup>2</sup>, Patrick Mariano<sup>2</sup>, Debra Dunaway-Mariano<sup>2\*</sup> and Osnat Herzberg<sup>1\*</sup>

<sup>1</sup>Center for Advanced Research in Biotechnology, University of Maryland Biotechnology Institute, Rockville, Maryland

<sup>2</sup> Department of Chemistry, University of New Mexico, Albuquerque, New Mexico

#### Table of Contents

Preparation of 3-Methyloxaloacetate...S-2

Preparation of Acetopyruvate.....S-3

<sup>1</sup>H NMR 3-Methyloxaloacetate.....S-4

<sup>13</sup>C NMR 3-Methyloxaloacetate.....S-5

<sup>1</sup>H NMR Acetopyruvate.....S-6

<sup>13</sup>C NMR Acetopyruvate.....S-7

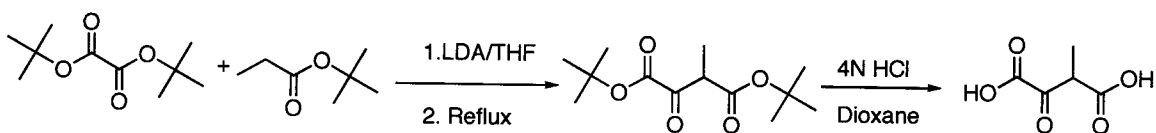

**Di-*t*-butyl 3-Methyloxalacetate.** To a solution of LDA, made from diisopropylamine ( 7.0 g, 0.07 mol) in THF (150 mL) and *n*-butyllithium (28 mL, 0.07 mol, 2.5 M in hexane), at -78 °C was added a solution of *t*-butyl propionate (8.5 g, 0.065 mol) in THF (50 mL). After stirring at -78 °C for 1 h, a solution of di-*t*-butyl oxalate (13.2 g, 0.065 mol) in THF (50 ml) was added. The resulting mixture was stirred overnight at room temperature, at reflux for 3 h and concentrated *in vacuo*. A solution of the residue in ethyl acetate was acidified and washed with water, dried over Na<sub>2</sub>SO<sub>4</sub> and concentrated *in vacuo* to give a residue, which was subjected to chromatography on silica gel (1:5 acetone-hexane) to provide di-*t*-butyl 3-methyloxalacetate (12.6 g, 75%). Spectroscopic data for the major keto tautomer <sup>1</sup>H NMR (CDCl<sub>3</sub>) 1.33 (d, 3H, J = 7.0 Hz), 1.42 (s, 9H), 1.53 (s, 9H), 3.92 (q, 1H, J = 7.0 Hz); <sup>13</sup>C NMR (CDCl<sub>3</sub>) 11.7, 27.6, 27.7, 49.2, 82.2, 84.1, 159.6, 168.9, 190.5; HRMS (ES) m/z 281.1367, calcd for C<sub>13</sub>H<sub>22</sub>O<sub>5</sub>Na 281.1365.

**3-Methyloxalacetate.** To a solution of 4N HCl in dioxane (20 mL) was added di-*t*-butyl 3-methyloxalacetate (1.0 g, 4 mmol) and MgCl<sub>2</sub>·6H<sub>2</sub>O (0.79 g, 4 mmol) at 0 °C, The mixture was stirred for 48 h at room temperature and filtered. The filtrate was concentrated *in vacuo* to afford 3-methyloxalacetate as a colorless crystalline solid, which was recrystallized from benzene to afford 0.57 g (100%), mp 128 °C (lit mp (1) 144 °C). Spectroscopic data for the major enol tautomer: <sup>1</sup>H NMR (CDCl<sub>3</sub>) 1.97 (s, 3H), 7.25(s, 1H); <sup>13</sup>C NMR (CDCl<sub>3</sub>) 6.8, 112.0, 151.6, 163.3, 165.1.

(1) Kabala, G.; Martell, A. E. (1981) *J. Am. Chem. Soc.*, **103**, 7609-7615.

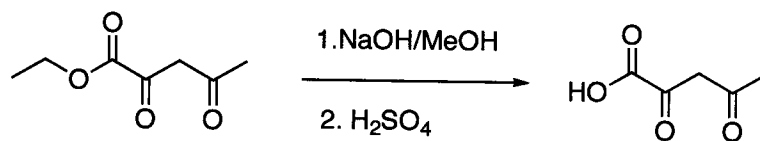

**Acetopyruvate.** A modification of the procedure described by Brecker *et al.* (2) was used. A solution of ethyl acetopyruvate (4.0 g, 0.025 mol) in methanol (50 mL) at 0 °C containing 5N NaOH (10 mL) was stirred for 2 h at room temperature. Filtration gave a precipitate which was washed with methanol (20 mL) and dissolved in 2 N H<sub>2</sub>SO<sub>4</sub> (40 mL). The resulting solution was extracted with chloroform. The chloroform extract were dried over Na<sub>2</sub>SO<sub>4</sub> and concentrated *in vacuo* to afford acetopyruvate as a yellow crystalline solid (1.7 g, 52 %). <sup>1</sup>H NMR (CDCl<sub>3</sub>) 2.26 (s, 3H), 6.45 (s, 1H); <sup>13</sup>C NMR (CDCl<sub>3</sub>) 26.3, 100.7, 163.3, 169.8, 197.5. the spectroscopic data of this substance matched those previously reported (2).

- (2) Brecker, L., Pogorevc, M., Griengl H., Steiner, W., Kappe, T. and Ribbons, D.W. (1999) *New J. Chem.* **23**,437-446.

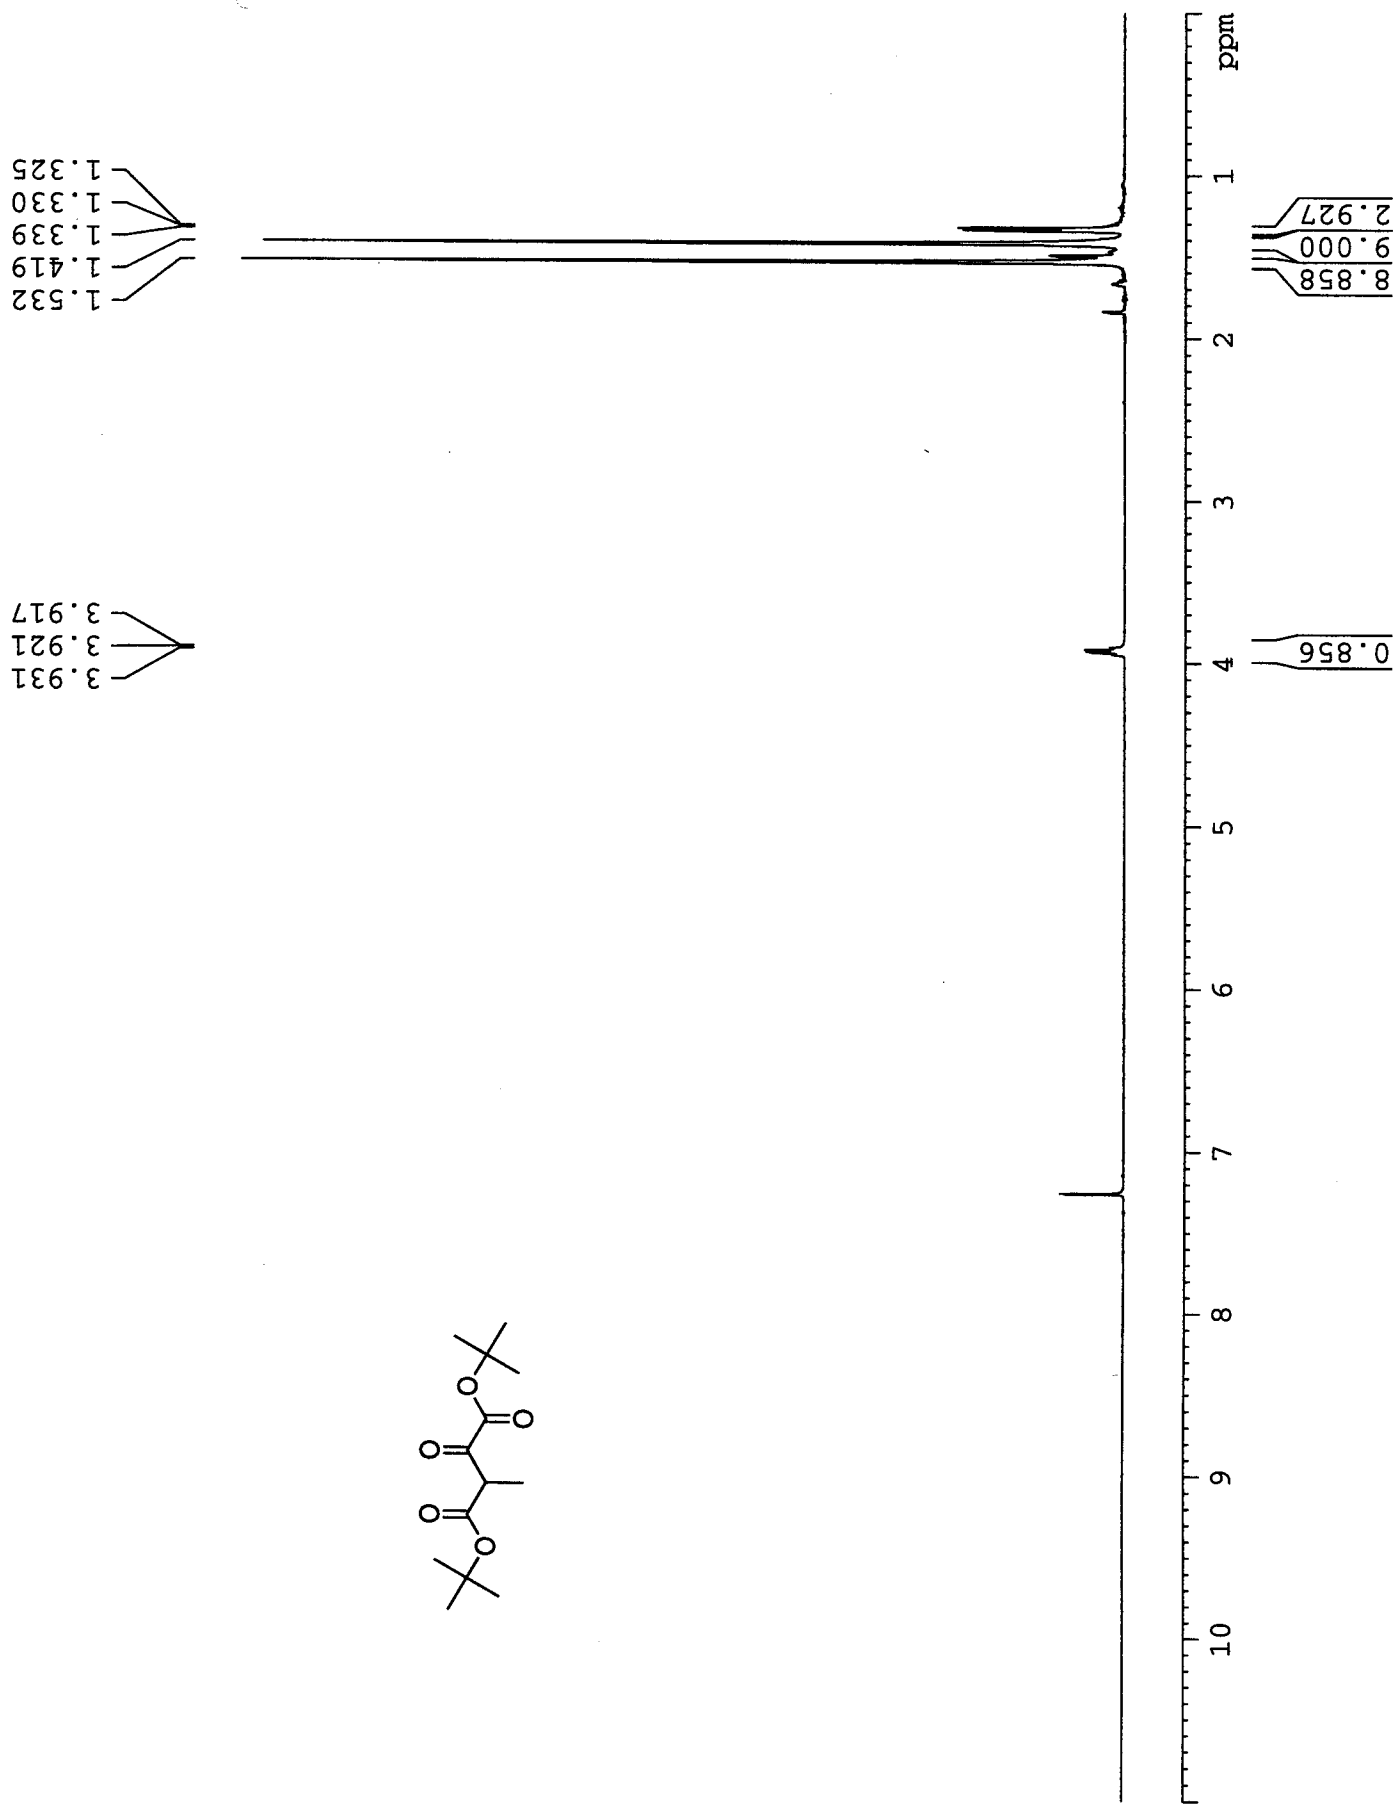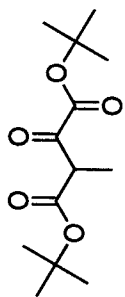

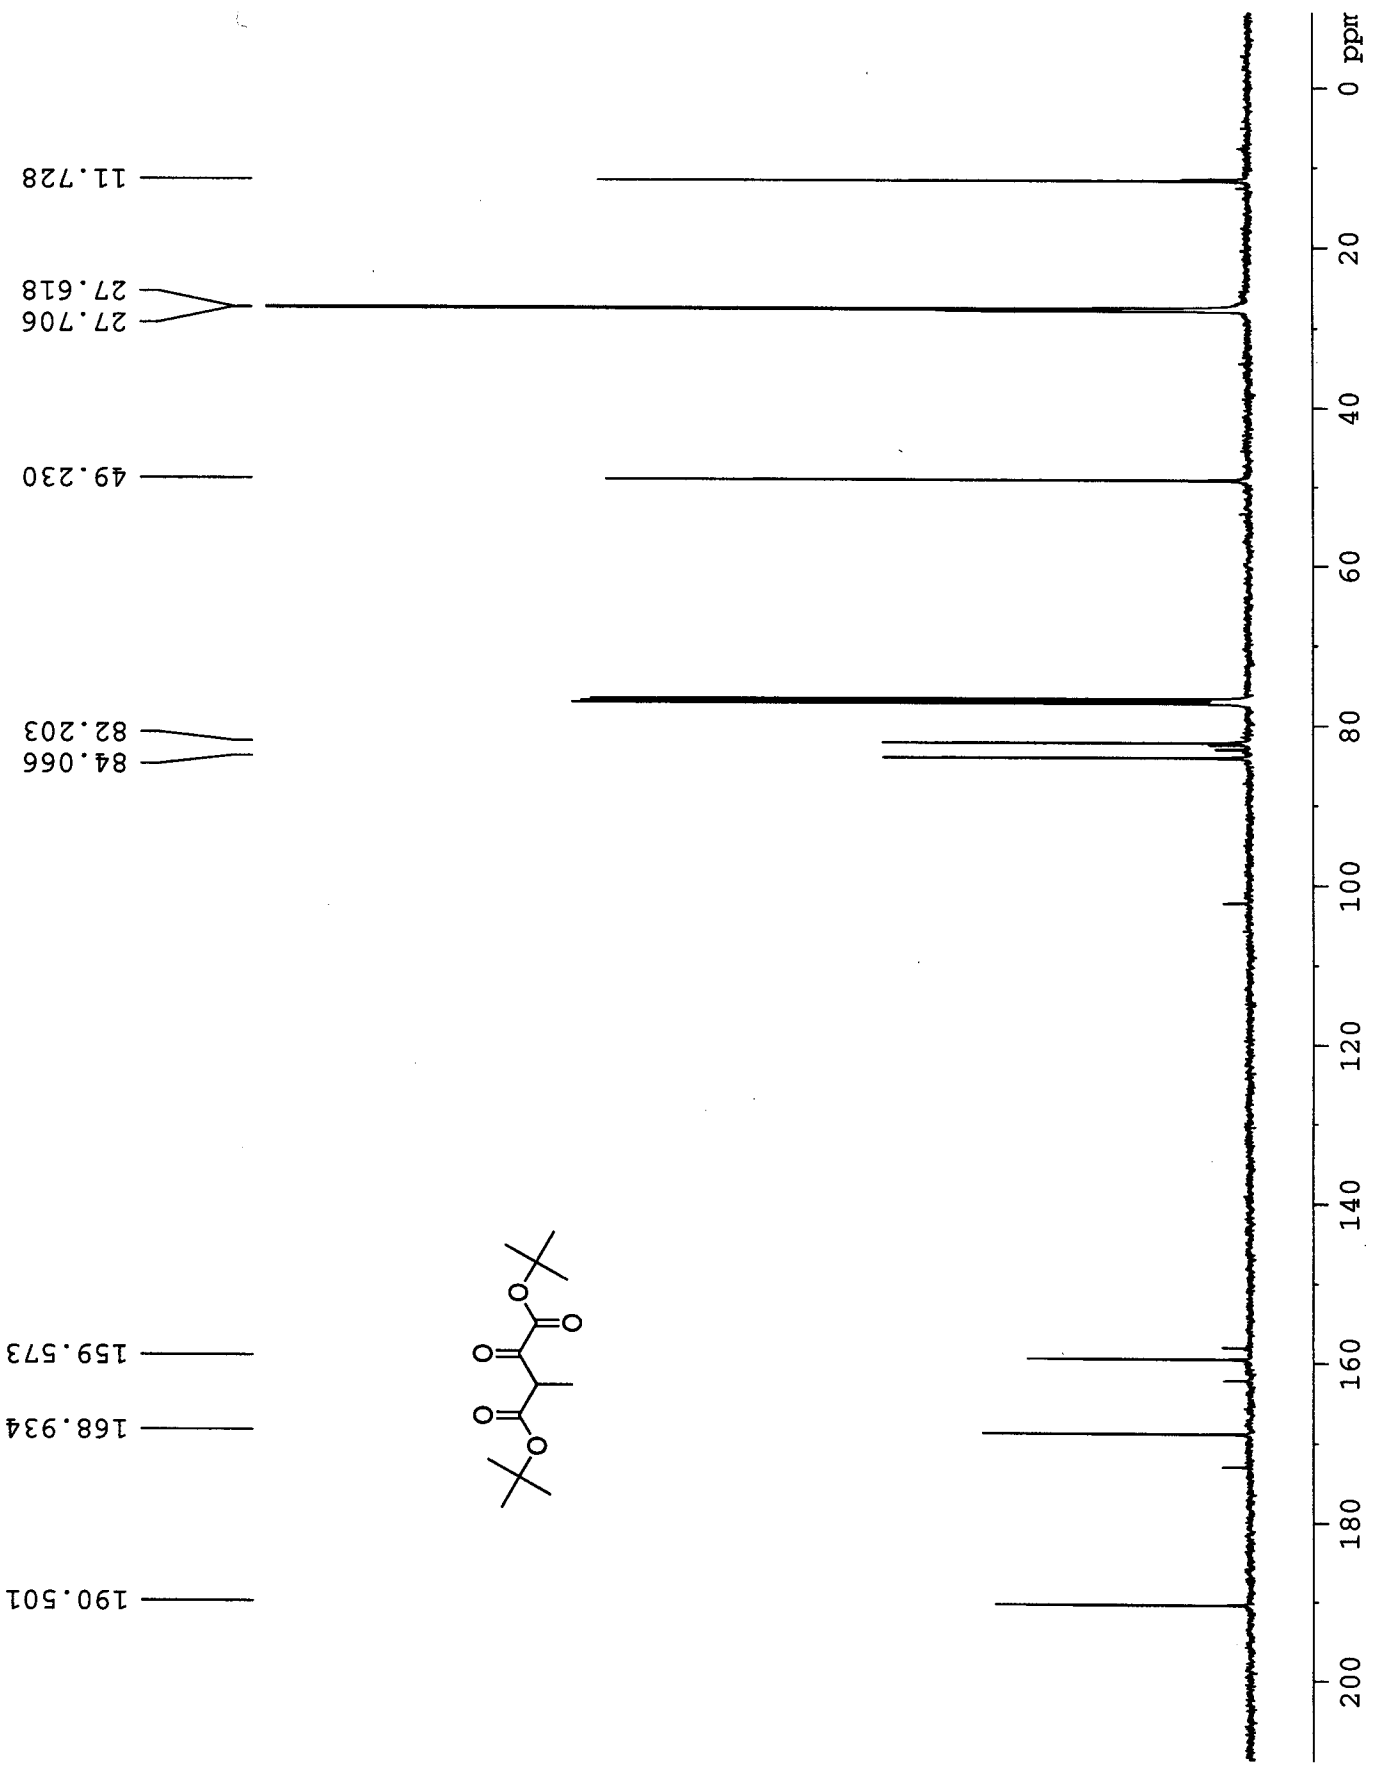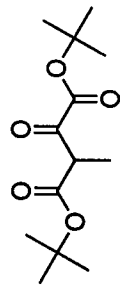

5-5

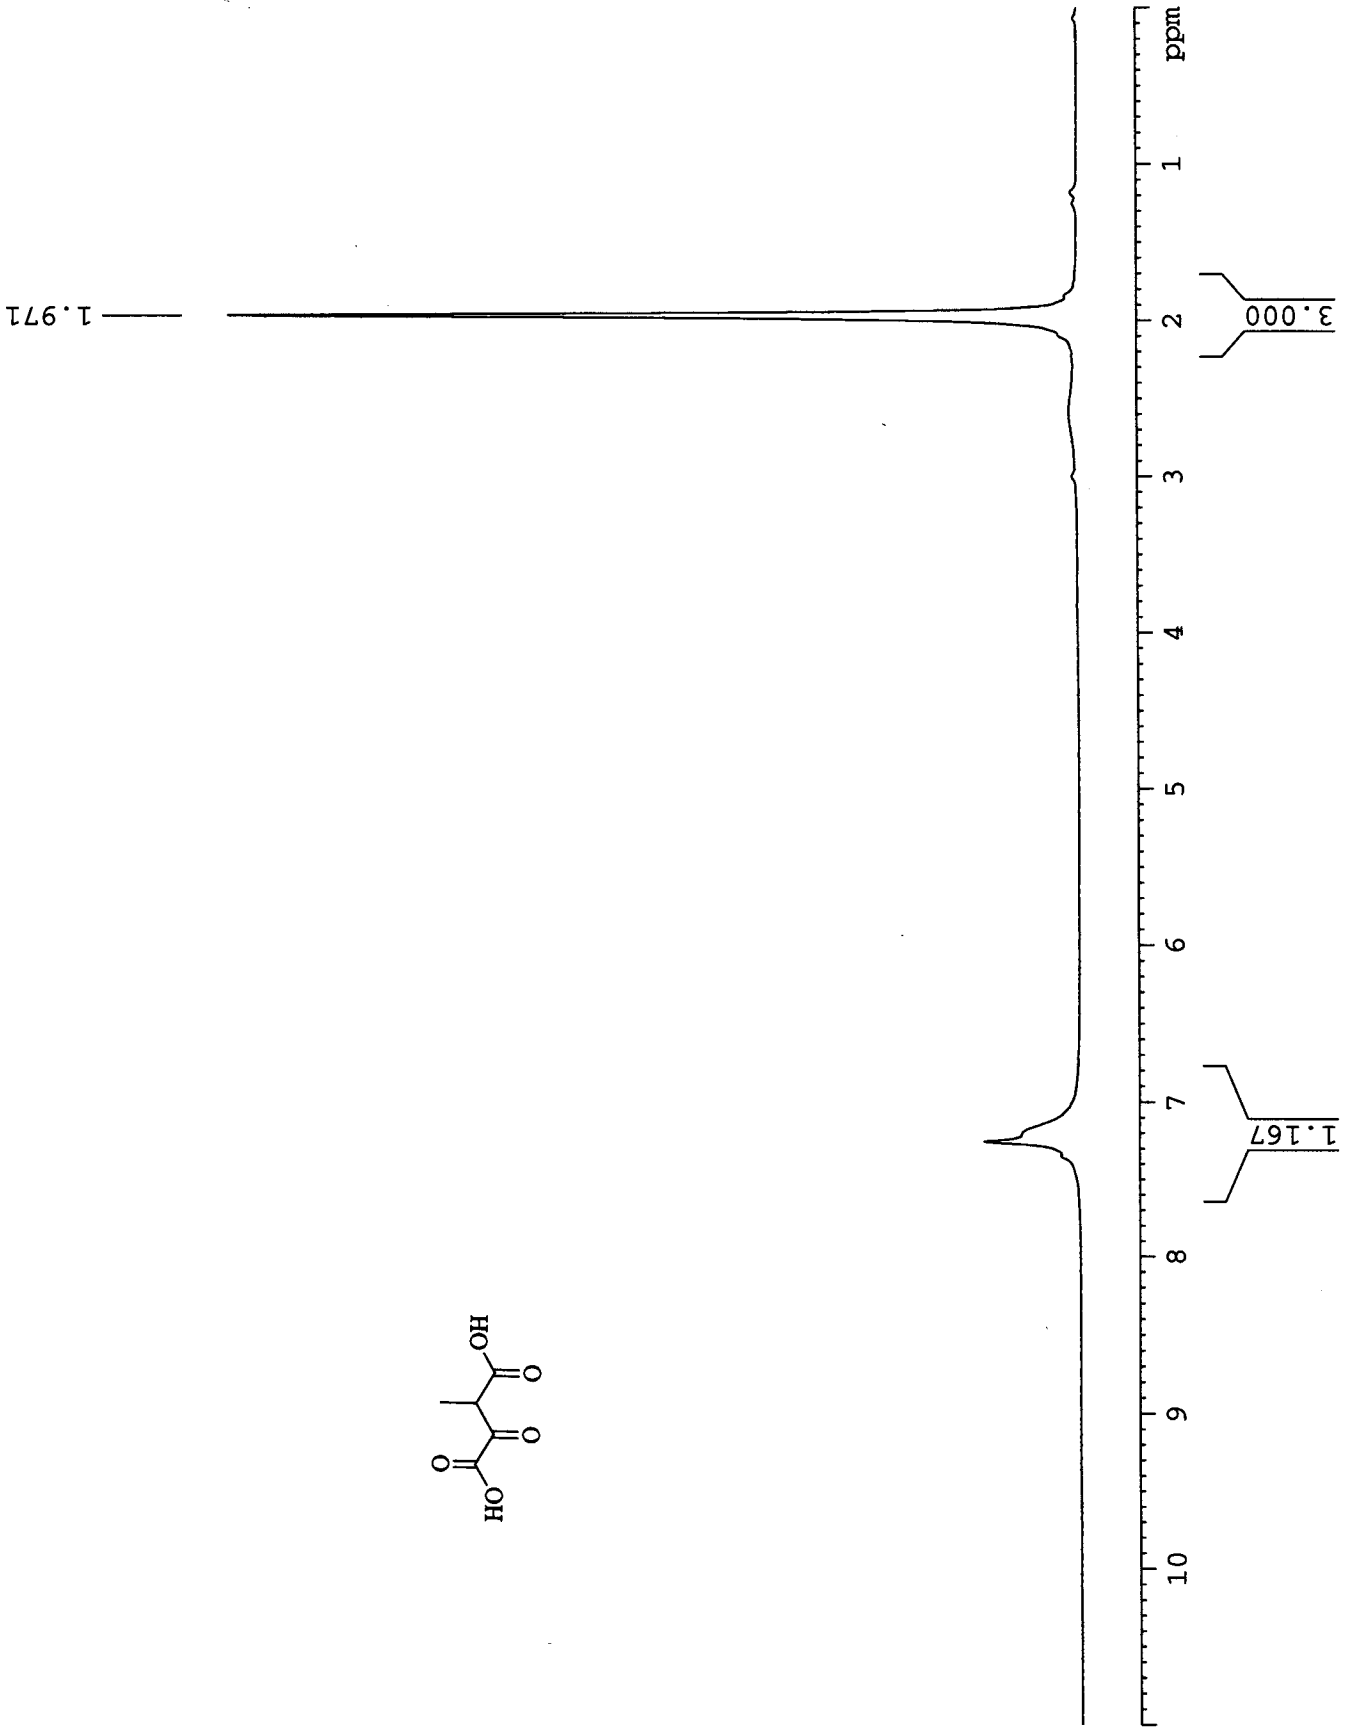

5-6

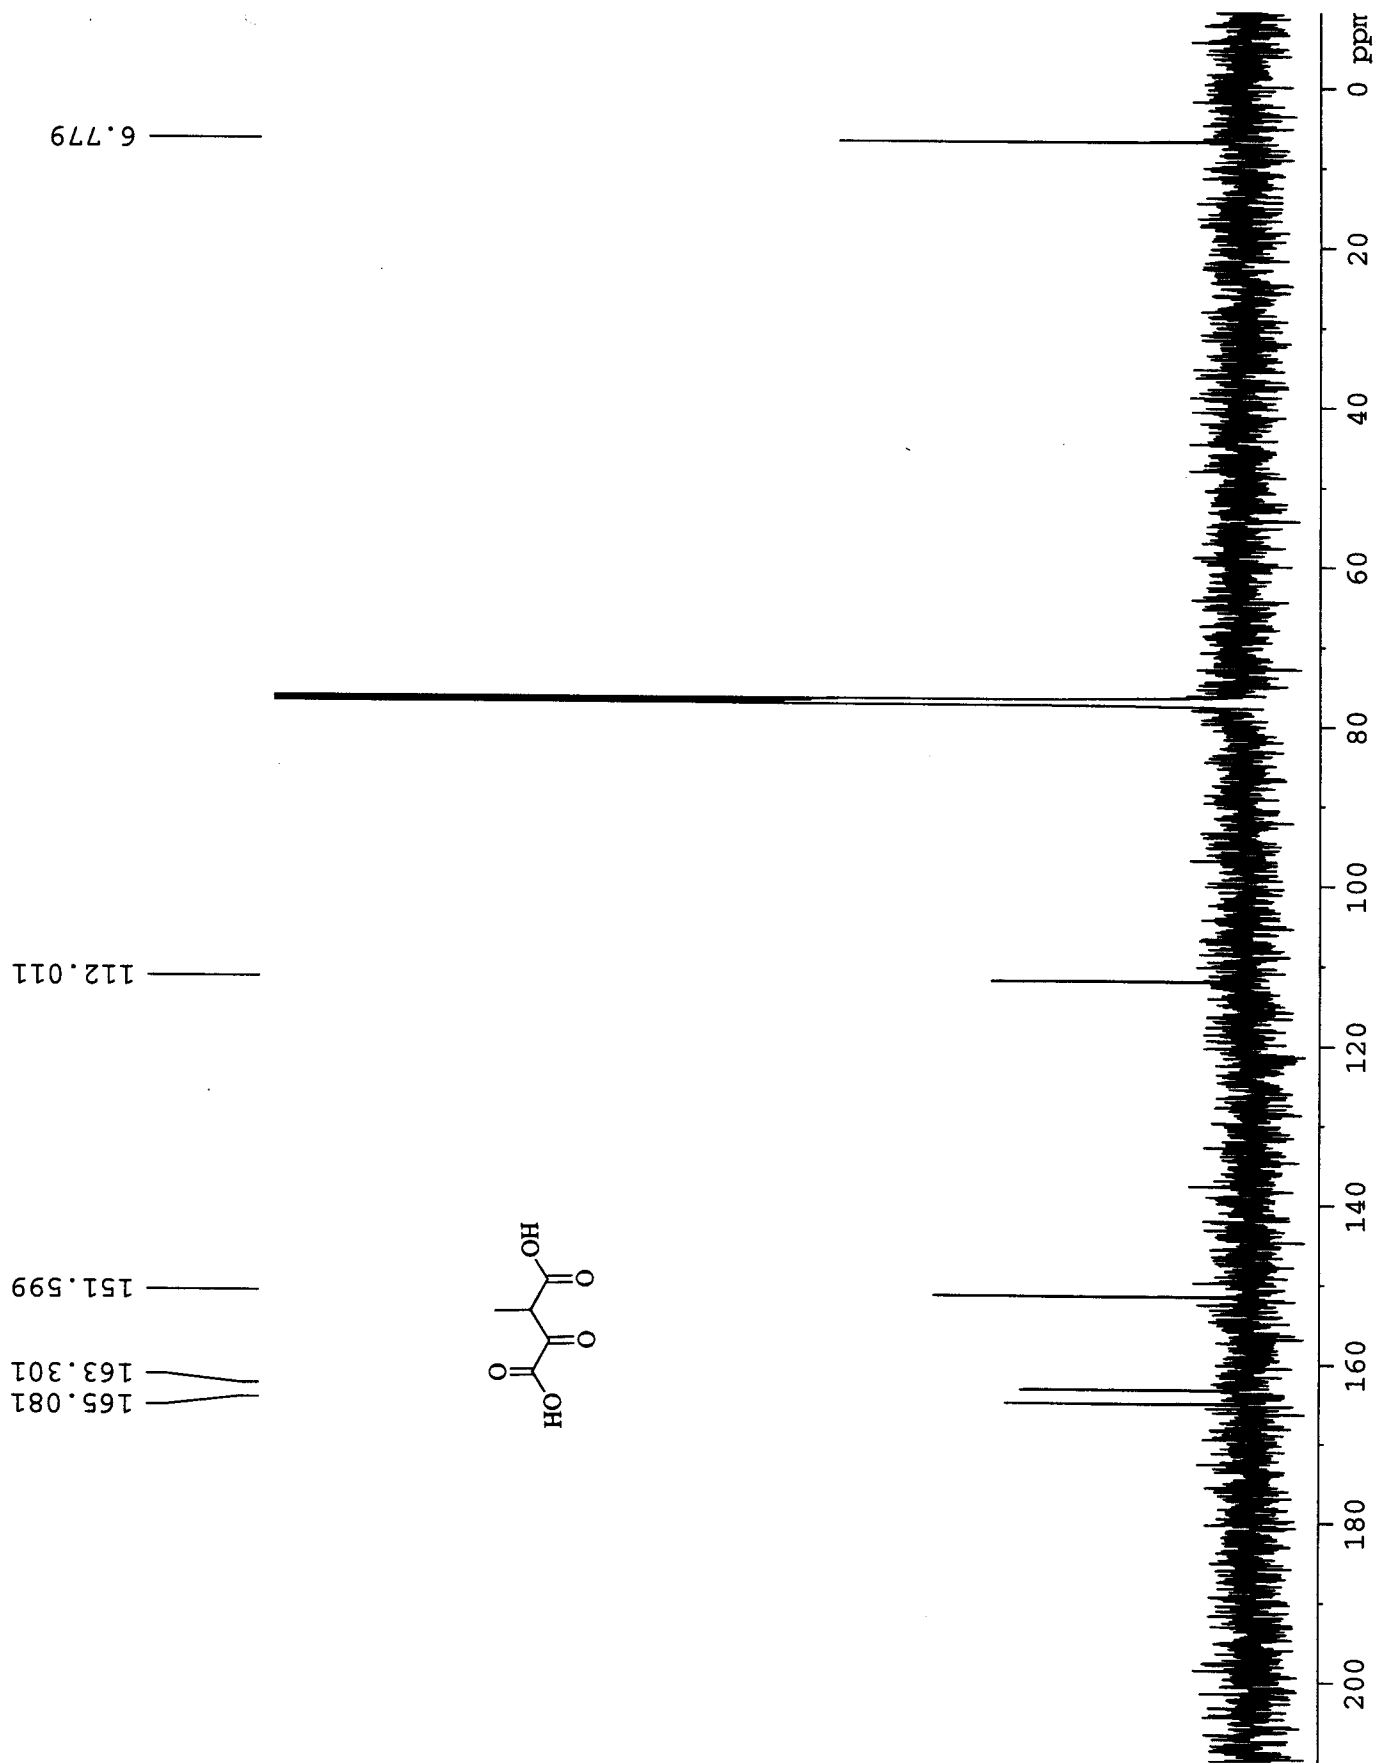

S-7
